# 1                    **Adaptation to an invasive host is collapsing a native ecotype**

2                                            **Author:** M L Censer<sup>1\*</sup>

3

## 4   **Affiliation:**

5   <sup>1</sup> University of California, Davis

6   \*Correspondence to [mlcenser@ucdavis.edu](mailto:mlcenser@ucdavis.edu)

7

8   **Abstract:** Locally adapted populations are often used as model systems for the early stages of  
9   ecological speciation, but most of these young divergent lineages will never become complete  
10   species. While the collapse of incipient species is theoretically common, very few examples have  
11   been documented in nature. Here I show that soapberry bugs (*Jadera haematoloma*) have lost  
12   adaptations to their native host plant (*Cardiospermum corindum*) and are regionally specializing  
13   on an invasive host plant (*Koelreuteria elegans*), collapsing a classic and well-documented  
14   example of local adaptation. All populations that were adapted to the native host - including  
15   those still found on that host today - are now better adapted to the invasive in multiple  
16   phenotypes. Weak differentiation remains in two traits, suggesting that homogenization across  
17   the region is incomplete. This study highlights the potential for adaptation to invasive species to  
18   disrupt native communities by swamping adaptation to native conditions through maladaptive  
19   gene flow.

20

21   **Main Text:** Locally adapted populations are often used as models for the early stages of  
22   speciation, particularly in the recent discussion of speciation driven by differential ecological  
23   conditions<sup>1</sup>. These lineages are convenient for the study of divergent evolution because they can

24 arise quickly, sometimes in tens or hundreds of generations, and the drivers of differentiation are  
25 often contemporary and identifiable. However, they are also theoretically more susceptible to  
26 collapse than young species due to incomplete intrinsic reproductive isolation<sup>2</sup>. The  
27 maintenance of local adaptation often relies on spatial isolation or continuing selection against  
28 migrants and hybrids, processes that are highly dependent on the stability of the local  
29 environment. Changes in the quality<sup>3</sup>, abundance, stability<sup>4,5</sup>, and proximity of habitats can all  
30 theoretically drive hybridization and collapse of young divergent lineages.

31 Existing examples of young species collapse fall into two broad categories: (1) If lineages  
32 have been diverging in allopatry and come into secondary contact before speciation is complete,  
33 one lineage may be absorbed into the other. In at least two cases, endemic species have been lost  
34 via this process<sup>6</sup>. (2) Environmental disturbance may break down reproductive barriers between  
35 lineages already co-existing in sympatry and produce a hybrid swarm<sup>7-9</sup>. Two examples of this  
36 process are the collapse of over 100 species of cichlids in Lake Victoria<sup>8</sup> and the more local  
37 collapse of a benthic-limnetic stickleback species pair<sup>9</sup>. This mechanism is also responsible for  
38 the breakdown of beak size divergence in one population of Galapagos finches<sup>10</sup>. Cases where  
39 collapse occurs *prior* to the completion of speciation, for example, during local adaptation, are  
40 exceptionally rare.

41 I analyzed populations of soapberry bugs that were locally adapted to different host  
42 plants in 1988 to determine whether these populations are following an ecological speciation  
43 trajectory or collapsing back together.

44 The red-shouldered soapberry bug *Jadera haematoloma* (Hemiptera: Rhopalidae) has  
45 provided a textbook case of local adaptation. Soapberry bugs are native to the southern peninsula  
46 and Keys of Florida, where they have co-evolved with a native balloon vine (*Cardiospermum*

47 *corindum*). In the mid-1900s, the golden rain tree (*Koelreuteria elegans*) was widely introduced  
48 to the peninsula of Florida and colonized by soapberry bugs<sup>11</sup>. By 1988 there was clear evidence  
49 of host-associated local adaptation. Adult feeding morphology was locally adapted to  
50 differences in host seedpod size: adult females adapted to *C. corindum* had long beaks  
51 hypothesized to be for feeding through the large seedpods of that host, while females from  
52 populations on *K. elegans* had short beaks suitable for feeding through the flattened pods of this  
53 host<sup>11</sup> (Fig. 1a). Juveniles had high survival and short development time on their local host and  
54 reduced survival and prolonged development time on the alternative host<sup>12,13</sup> (Fig. 2a & Fig. 3a).  
55 Females from *C. corindum* produced relatively few large eggs and females from *K. elegans*  
56 produced many small eggs<sup>12</sup> (Fig. 4a). Based on this evidence of strong local adaptation and the  
57 largely allopatric distribution of the two host plants in Florida, this system was a strong candidate  
58 for ecologically driven ‘incipient speciation’.

## 59 **Results**

60 Current evidence demonstrates that soapberry bugs in Florida are not following a  
61 speciation trajectory, but have instead become more similar in all traits that were previously  
62 locally adapted. In 1988, the mean beak length of bugs on the native *C. corindum* was 34%  
63 greater than that of bugs on the invasive *K. elegans* ( $9.33 \pm 0.21$ mm vs.  $6.93 \pm 0.12$ mm; t-  
64 value=16.02,  $p < .0001$ ,  $df=68$ ). In 2013-2015, the difference between the same two host-  
65 associated populations was reduced to 5% ( $7.48 \pm 0.18$ mm vs.  $7.13 \pm 0.10$ mm; t-value=2.724,  
66  $p=.007$ ,  $df=170$ ) (Fig. 1). In a total of 8 populations across Florida measured in 2013-2015, the  
67 difference in beak length between the two hosts was not statistically significant ( $7.32 \pm 0.12$ mm  
68 vs.  $7.15 \pm 0.06$ mm; t-value=-1.57,  $p > .05$ ,  $df=514$ ; Extended Data Fig. 1). This reduction in  
69 differentiation is driven by changes on the native host plant. Beak lengths of individuals in Key

70 Largo, where *C. corindum* associated beak length was originally estimated, have decreased to  
71 80% of their historical length (t-value=10.978, p<.0001, df=104). In contrast, bugs collected in  
72 Lake Wales, where *K. elegans*-associated beak length was originally estimated, have shown very  
73 little change since 1988 (t-value=-1.952, p=.054, df=97). The observed beak length change is in  
74 the opposite direction predicted by the hypothesis that beak length should be adapting to match  
75 pod size in these populations.

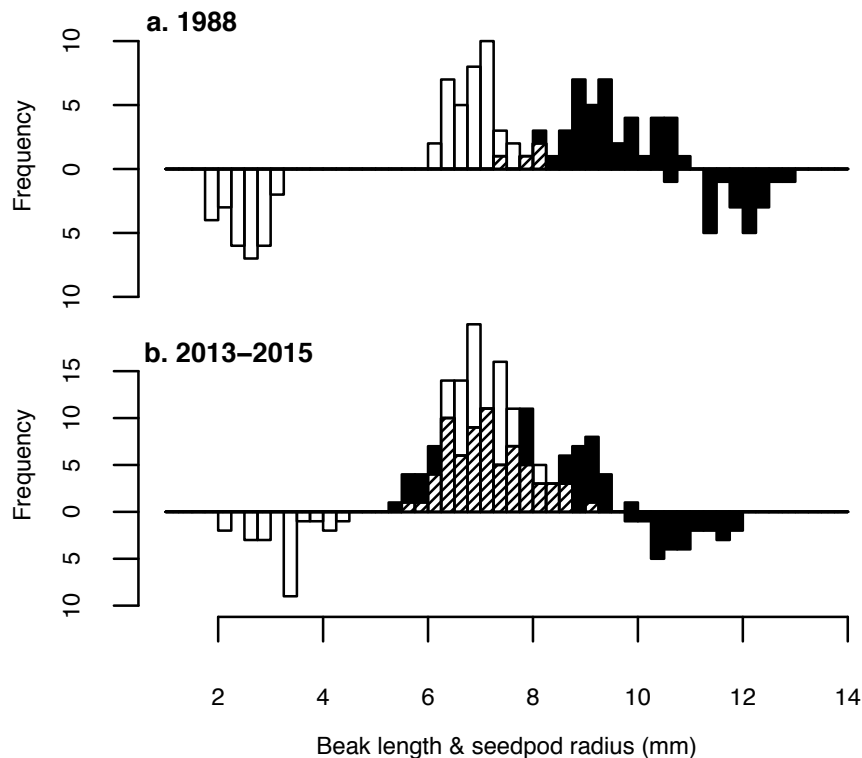

76  
77 Figure 1. Beak length and pod size on both hosts between years. Black bars indicate pods or bugs collected from *C.*  
78 *corindum*, white bars indicate pods or bugs from *K. elegans*, and cross-hatching indicates areas where the two  
79 distributions are overlapping. a. 1988 female *J. haematoloma* beak length (upright bars) and pod size of each host  
80 (inverted bars). Data taken with permission from Carroll & Boyd 1992. b. Combined 2013-2015 female *J.*  
81 *haematoloma* beak length (upright bars) and pod size of both host plants (inverted bars). Data for 7 additional sites  
82 collected in 2013-2015 is available in Extended Data Fig. 1.

83 Cross-rearing experiments also support the hypothesis that contemporary populations are  
84 less differentiated than they were historically (Fig. 2). In 2014, survival from hatching to

85 adulthood was dramatically higher on the invasive host *K. elegans* than on *C. corindum* for all  
86 populations (0.81 vs. 0.10; z-value=8.908, p<.0001; Fig. 2b). This is in stark contrast to  
87 historical cross-rearing experiments, in which juvenile survival was consistently higher on the  
88 host from which a population was collected (interaction z-value=3.299, p<.001; Fig. 2a).

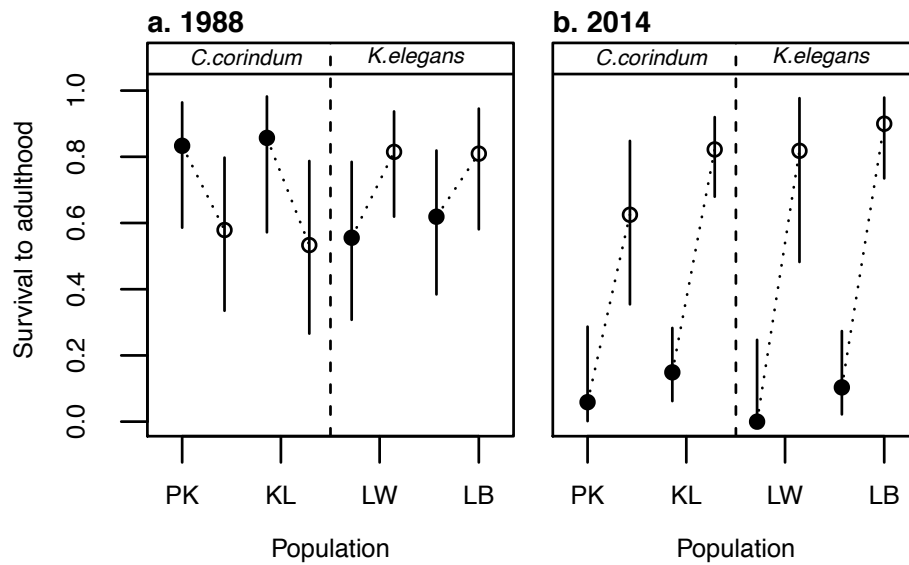

89  
90 Figure 2. Juvenile survival on both host plants in 1988 and 2014. a. Proportion of juveniles from 4 populations  
91 surviving to adulthood when reared on *C. corindum* (black circles) and *K. elegans* (white circles) in 1988. Data  
92 taken with permission from Carroll et al 1998. b. Proportion of juveniles from the same 4 populations surviving to  
93 adulthood when reared on both host plants in 2014. Populations PK and KL were collected from *C. corindum*; LW  
94 and LB from *K. elegans*. Error bars represent the 95% binomial confidence interval using the Pearson-Klopper  
95 method. Data for 4 additional sites in 2014 is available in Extended Data Fig. 2.

96  
97 Changes in individual egg weight also support a loss of local differentiation (Fig. 3). The  
98 mean egg weight for two populations from *C. corindum* was  $0.712 \pm 0.018$  mg per egg in 1988,  
99 while populations on *K. elegans* had eggs averaging  $0.560 \pm 0.012$  mg per egg. In 2014, egg  
100 weight averaged  $0.565 \pm 0.036$  mg per egg in the same two *C. corindum* populations and  
101  $0.570 \pm 0.019$  mg per egg in the same three *K. elegans* populations (t-value=.205, p=.84, df=19).

102 This reduction in differentiation is driven entirely by changes in the egg weight of individuals  
103 from *C. corindum* ( $t>5$ ,  $df=18$ ,  $p<.001$ ), while egg weight for individuals from *K. elegans* has  
104 remained unchanged ( $t<1.76$ ,  $df=48$ ,  $p>0.05$ ). This lack of differentiation is consistent across a  
105 total of 8 populations measured in 2014 ( $0.573\pm0.023$  [*C.corindum*] vs.  $0.572\pm0.015$   
106 [*K.elegans*];  $t\text{-value}=0.076$ ,  $p=0.94$ ,  $df=36$ ; Extended Data Fig. 3).

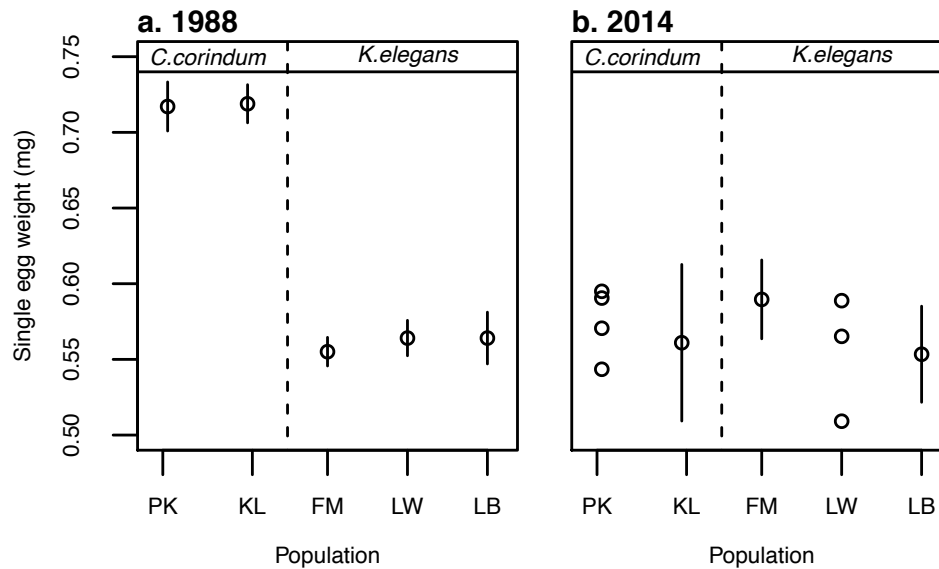

107  
108 Figure 3. Individual egg weight differentiation in 1988 and 2014. a. The average weight of individual eggs laid by  
109 females from 5 different populations in 1988. Data taken with permission from Carroll et al 1998. b. The average  
110 weight of individual eggs laid by females from the same 5 populations in 2014. Populations PK and KL were  
111 collected from *C. corindum*; FM, LW and LB from *K. elegans*. Due to limited sample size, all points for PK and LW  
112 are plotted individually. Error bars represent 95% confidence intervals. Data for 3 additional sites in 2014 is  
113 available in Extended Data Fig. 3.

114  
115 Changes in development time are also consistent with decreased differentiation (Fig. 4).  
116 In 1991, individuals from *C. corindum*-associated populations had a mean development time of  
117  $41.69\pm0.94$  days while those from *K. elegans*-associated populations had a mean development  
118 time of  $32.53\pm0.78$  days when both were reared on *K. elegans* ( $t\text{-value}=-13.762$ ,  $p<.001$ ). In

119 2013 and 2014, the same populations from *C. corindum* took an average of  $37.21 \pm 0.62$  days to  
120 reach adulthood, while those from *K. elegans* took  $31.48 \pm 0.33$  days ( $t$ -value=-11.511,  $p < .001$ )  
121 when reared on *K. elegans*. There has been a pronounced decrease in development time in *C.*  
122 *corindum*-associated populations (year effect=4.61 days;  $t$ -value=7.37,  $p < 0.001$ ,  $df=149$ ) that is  
123 absent in *K. elegans*-associated populations (year effect=.86 days;  $t$ -value=1.64, mean  $p=.2$ ,  
124  $df=206$ ). The pattern of reduced, but detectable, differentiation is consistent across the 8 total  
125 populations measured in 2013-2014 ( $35.29 \pm 0.49$  days vs.  $31.58 \pm 0.27$  days;  $t$ -value=10.8,  
126  $p < .001$ ,  $df=246$ ; Extended Data Fig. 4).

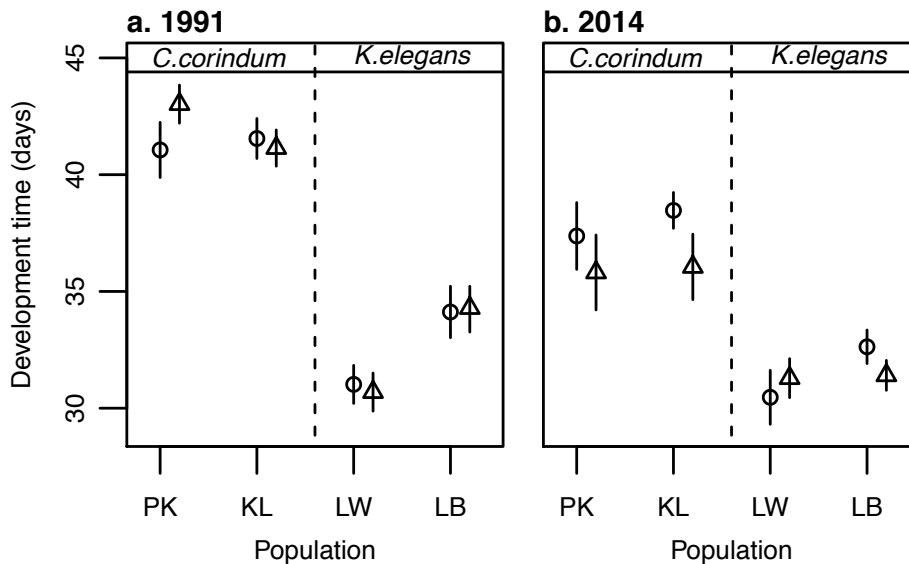

127  
128 Figure 4. Development time in 1991 and 2013-2014. a. Development time for females (circles) and males  
129 (triangles) from 4 populations in 1991. Data taken with permission from Carroll et al 1997. b. Development time  
130 for the same 4 populations combined from 3 experiments in 2013 and 2014. Populations PK and KL were collected  
131 from *C. corindum*; LW and LB from *K. elegans*. All individuals were reared on *K. elegans*. Error bars represent 95%  
132 confidence intervals. Data for 4 additional sites in 2013-2014 and by experiment is available in Extended Data Fig.  
133 4. Data for individuals reared on *C. corindum* is presented in Extended Data Fig. 5.

134

135 **Discussion**

136           This classic case of local adaptation is transitioning to a set of populations all specialized  
137 on the invasive *K. elegans*. The simplest explanation for this pattern is that gene flow from *K.*  
138 *elegans* to *C. corindum* has increased over the last 26 years. This case does not conform to either  
139 of the existing mechanisms of species collapse, both of which require sympatry. Instead, genes  
140 facilitating survival on *K. elegans* may have followed a ‘stepping stone’ process of migration  
141 from one *C. corindum* population to the next as a response to increased migration from *K.*  
142 *elegans*. This was likely facilitated by the increasing abundance of the invasive host on the  
143 lower peninsula and decreasing regional abundance of the native host<sup>11</sup>. Stronger competition  
144 on *C. corindum* from native herbivores that are not contending with maladaptive gene flow may  
145 be exacerbating the negative effects of decreased local adaptation on abundance.

146           Although there are few empirical examples, theory predicts the degradation of local  
147 adaptation under a wide range of environmental conditions<sup>12,13</sup>. In 2001, Ronce and Kirkpatrick  
148 predicted a downward spiral of maladaptation and population size, termed ‘migrational  
149 meltdown’, occurring in spite of strong local selection under moderate migration, resulting in a  
150 single specialist if migration is asymmetric<sup>14</sup>. This theory suggests that maladapted populations  
151 of soapberry bugs on *C. corindum* are unlikely to be ‘rescued’ by evolution<sup>15</sup>, but will likely  
152 remain sinks unless migration from *K. elegans* decreases well below earlier rates.

153           The current literature on local adaptation is heavily skewed toward cases that appear to be  
154 progressing towards speciation, potentially because these are the cases that persist long enough  
155 to be detected. As environmental disturbance rapidly shifts the targets of selection, local  
156 adaptation is likely to emerge and collapse in many systems as populations move entirely onto  
157 novel resources.



158           The rapid adaptation of soapberry bugs to *K. elegans* in 1988 contradicted the general  
159   expectations of evolutionary ecology as one of the seminal examples of evolution occurring over  
160   ecologically relevant time scales<sup>16</sup>. The second evolutionary shift in this system, the extensive  
161   loss of adaptation to their ancestral host plant throughout the state of Florida, is similarly  
162   striking. Adaptation on short time scales has proven to be more of a rule than an exception<sup>17-21</sup>.  
163   The ephemerality of local adaptation may prove to be similarly common.

164

## 165   **Methods**

### 166   **Collection**

167           *Jadera haematoloma* were collected in May 2013, December 2013, April 2014, and April  
168   2015 from the following locations (coordinates of sample collection sites in parentheses;  
169   directions available on request): Gainesville (26.660477, -82.346965), Leesburg (28.796398,-  
170   81.877980), Lake Wales (27.934719, -81.576640), Ft. Myers (26.633952, -81.879978),  
171   Homestead (25.570843, -80.455236 [*C.corindum*] & 25.551041, -80.420876 [*K.elegans*]), Key  
172   Largo (25.175560, -80.367695), and Plantation Key (24.991368, -80.539964). The northern four  
173   sites were collected from *Koelreuteria elegans* and the southern two sites were collected from  
174   *Cardiospermum corindum*; bugs were collected from both host plants in Homestead, the only  
175   presently known sympatric site. Host plant seeds were collected from each site in December  
176   2013 and April 2014 and stored at 4°C until they were used for rearing. Seeds with indications  
177   of previous feeding were discarded. Each *K. elegans* site had 5-10 individual trees and each *C.*  
178   *corindum* site had 3-15 individual vines sampled.

### 179   **Morphology**

180 Adults from the field were phenotyped to the nearest .02 mm for beak length (the  
181 distance from the anterior tip of the tylus to the distal tip of the mouthparts), thorax width (taken  
182 at the widest part of the pronotum), and forewing length (from anterior to distal tip) using  
183 Mitutoyo calipers under a dissecting microscope. A subset of adults had the additional  
184 measurement of body length, the length from the anterior tip of the tylus to the distal tip of the  
185 closed wings. Female morphology is reported in Fig. 1 and Extended Data Fig. 1, Fig. 6 & Fig.  
186 7. Since differentiation in any male morphology has not been previously documented, and was  
187 not found here, these results are not discussed. Male morphological data will be publicly  
188 archived along with female data.

### 189 **Sample sizes**

190 For 1988 data, sample size for female beak length on *C. corindum* and *K. elegans* was 44  
191 and 40, respectively. Sample size for pod size on *C. corindum* and *K. elegans* was 20 and 28,  
192 respectively. For 2013-2015 data, sample size for female beak length on historically measured  
193 *C. corindum* and *K. elegans* was 107 and 109, and sample size for pod radius on *C. corindum*  
194 and *K. elegans* was 19 and 22, respectively. Sample sizes for additional populations (Plantation  
195 Key, Homestead (*C. corindum*), Homestead (*K. elegans*), Ft. Myers, Leesburg, and Gainesville)  
196 were 34, 43, 29, 88, 82, and 32, respectively. Sample sizes were maximized to the extent that  
197 availability in the field and time permitted, with additional weight being given to populations  
198 with available historical data. All individuals that were collected were measured unless they  
199 were so physically damaged in transport as to make morphology unreliable (<2% of all  
200 individuals collected). No blinding was done during these measurements.

### 201 **Cross-rearing**

202 All rearing was carried out in Sanyo Versatile Environmental Test Chambers at 28°C  
203 during the day and 27.5°C at night, 50% relative humidity with a 14:10 Light:Dark cycle,  
204 following climate conditions from Carroll et al 1998. Adults from the field were housed in  
205 vented Petri dishes lined with filter paper and given water in a microcentrifuge tube stoppered  
206 with cotton (“water pick”) and 3 seeds of their field host plant. Eggs were collected daily until  
207 hatching; adults were then frozen at -20C for morphological analyses. Nymphs were removed  
208 within 12 hours of hatching to reduce egg cannibalism and housed individually in mesh-lidded  
209 cups lined with filter paper with a water pick and a seed of their randomly assigned host plant.  
210 Four nymphs were used from each mother; two were assigned to each host plant. Prior to  
211 hatching, datasheets were generated that randomized the order of the location of origin for each  
212 seed using the “sample” command in R. When the first nymph in a family hatched, a coin was  
213 flipped to determine which host it would be assigned to; the second hatching nymph was  
214 assigned to the opposite host. The same procedure was carried out for the third and fourth  
215 nymphs. This was to ensure that there would not be a bias in early hatching nymphs being  
216 assigned more frequently to one host or the other, and to avoid having more individuals reared  
217 on one host or the other in the event that families had fewer than 4 eggs successfully hatch.  
218 Additional seeds (a total of 2 for *K.elegans* and 3 for *C.corindum*, for a total seed mass of  
219 ~150mg) were added at 7 days of age. Individual containers were rotated daily within mesh  
220 boxes (each holding 36 individuals), and boxes were rotated daily within the growth chamber to  
221 reduce the effect of specific location. Water, paper and cotton were changed weekly. Nymph  
222 survival was assessed daily.

### 223 **Sample sizes**

224 For 1988 data, sample sizes for cross-rearing in each population (Plantation Key, Key  
225 Largo, Lake Wales, and Leesburg) are n=14, 18, 18, and 21 reared on *C. corindum*, and n=15,  
226 19, 27, and 21 reared on *K. elegans*. For 2014 data, sample sizes for the same populations are  
227 n=17, 47, 13, and 29 reared on *C. corindum* and n=16, 45, 11, and 30 reared on *K. elegans*. Each  
228 population was represented by n=8, 23, 8, and 15 independent families. For the 4 populations not  
229 represented in historical datasets (Homestead (*C. corindum*), Homestead (*K. elegans*), Ft. Myers,  
230 and Gainesville) the sample sizes are n=34, 7, 36, 36, and n=34, 7, 35, and 39 reared on *C.*  
231 *corindum* and *K. elegans* respectively. Each of these populations is represented by n=17, 4, 18,  
232 and 21 independent families. Sample sizes were limited by 1) the availability of adults at each  
233 field site; 2) survival of collected adults through transport within Florida and from Florida to the  
234 lab where rearing was conducted; and 3) whether or not individual females produced viable eggs  
235 after transport. Females were housed only with seeds from their local site both during transport  
236 and during egg production; therefore, any selection that may have occurred during this process  
237 should have exacerbated local adaptation rather than masking it. No blinding of observers was  
238 used in this metric.

### 239 **Egg mass**

240 Individual egg mass was collected from surviving females reared in the F1 laboratory  
241 generation (rearing methods described above). Females were randomly paired with males from  
242 the same population, but with different parents, within 2-5 days of eclosion. Individuals were  
243 not paired earlier to allow time for the exoskeleton to harden, reducing susceptibility to  
244 cannibalism and physical damage to the genitalia during mating attempts. Water, paper, and  
245 cotton were changed weekly, and two additional seeds were added weekly. Eggs were counted  
246 and massed in groups (from 1 to 84 eggs per group) to within .01 mg daily for the first 10 days

247 after a female began laying eggs, resulting in up to 10 separate estimates of egg mass per female.  
248 Individuals who did not lay eggs in the first 30 days after reaching adulthood were excluded, as  
249 that is the estimated life expectancy in the field (Carroll 1991). The egg mass reported is  
250 combined for individuals reared on both *K. elegans* and *C. corindum*.

### 251 **Sample sizes**

252 For 1988 data, sample sizes for each population (Plantation Key, Key Largo, Ft. Myers,  
253 Lake Wales, and Leesburg) are n=16, 20, 24, 16, and 50. For 2014 data, sample sizes for the  
254 same 5 populations are n=4, 9, 13, 3, and 12. For the 3 populations without historical data  
255 (Homestead (*C. corindum*), Homestead (*K. elegans*), and Gainesville), sample sizes are n= 8, 2,  
256 and 13. Sample sizes for this metric were primarily restricted by mortality during development,  
257 the limited number of potential mates within the appropriate population and time frame, and  
258 willingness of individuals to mate and produce eggs. All individuals that successfully  
259 reproduced were included in this metric; however, females who eclosed later were slightly less  
260 likely to be included, because in some cases all available males had already been assigned to  
261 earlier eclosing females by the time they emerged. This problem was in part due to the fact that  
262 males had slightly shorter development time than females in this experiment, a pattern that was  
263 not present in previous studies, and was therefore not anticipated during mate allocation. No  
264 blinding of observers was used in this metric.

### 265 **Development time**

266 Development time was combined from three separate experiments using the rearing  
267 methodology described above. The first experiment was conducted in May 2013 (Extended Data  
268 Fig. 4b) the second from the F1 generation in April 2014 (Extended Data Fig. 4c), and the third  
269 from the F2 generation in the same year (Extended Data Fig. 4d). Individuals were checked

270 daily for eclosion to adulthood, and every individual that survived was included. Development  
271 time is only reported in the main text for individuals reared on golden rain tree. Very few  
272 individuals successfully reached adulthood on balloon vine in each of these experiments, so there  
273 is potential for a single generation of strong selection driving observed patterns on this natal host.  
274 Mortality occurred largely during the first instar. This is likely due to either small beak size or  
275 weak beak musculature in first instar bugs, which become less problematic once bugs reach later  
276 instars. It is possible that individuals with short first instars were therefore more likely to  
277 survive, which could contribute to a shortening of overall development time in individuals reared  
278 on balloon vine. Consistent with this hypothesis, the development times of individuals surviving  
279 to adulthood on balloon vine were significantly shorter than those developing on golden rain tree  
280 (Extended Data Fig. 5b); however, given the scarcity of these data, I do not draw any  
281 conclusions here. No blinding of observers was used in this metric.

## 282 **Sample sizes**

283 For 1991 data, sample sizes for each population (Plantation Key, Key Largo, Lake Wales,  
284 and Leesburg) were n=15, 24, 35, and 33, for females and n=15, 26, 42, and 43 for males. For  
285 the same populations in 2013-2014, sample sizes are n=16, 34, 15, 27, for females and n=16, 20,  
286 21, and 27 for males. These metrics were combined from 3 experiments, each of which followed  
287 the same protocol, but had slightly different sample sizes for each population. In 2013, data was  
288 collected for 7 populations (Plantation Key, Key Largo, Homestead (*C. corindum*), Homestead  
289 (*K. elegans*), Ft. Myers, Lake Wales, and Leesburg) with n=7, 4, 9, 8, 5, 11, and 6 for females  
290 and n=12, 4, 15, 10, 10, 11, and 2 for males. In 2014, generation 1, data was collected for 8  
291 populations (Plantation Key, Key Largo, Homestead (*C. corindum*), Homestead (*K. elegans*), Ft.  
292 Myers, Lake Wales, Leesburg, and Gainesville) with n=8, 23, 12, 2, 16, 4, 11, and 14 for females

293 and n=2, 14, 20, 3, 16, 7, 17, and 15 for males. In 2014, generation 2, data was collected for 8  
294 populations (Plantation Key, Key Largo, Homestead (*C. corindum*), Homestead (*K. elegans*), Ft.  
295 Myers, Lake Wales, Leesburg, and Gainesville) with n=1, 7, 5, 2, 11, 0, 10, and 13 for females  
296 and n=2, 2, 7, 1, 11, 3, 8, and 11 for males. For individuals reared on *C.corindum* in 1991,  
297 sample size for each population (Plantation Key, Key Largo, Lake Wales, and Leesburg) were  
298 n=15, 24, 35, and 33 for females and n=15, 26, 42, and 43 for males. For all experiments  
299 combined in 2013-2014, sample sizes for each population (Plantation Key, Key Largo,  
300 Homestead (*C. corindum*), Homestead (*K. elegans*), Ft. Myers, Lake Wales, Leesburg, and  
301 Gainesville) is n=11, 7, 9, 3, 2, 0, 4, and 4 for females and n=3, 4, 5, 2, 3, 4, 4, and 1 for males.  
302 Sample size was limited by the same factors that limited collection for assessing survival, and  
303 then by mortality itself, as development time can only be measured for individuals that reach  
304 adulthood.

305

### 306 **Statistical analyses**

307 All analyses were conducted in the statistical program R version 3.2.2. Analyses  
308 including random factors used the package lme4. Testing assumptions for homoscedasticity  
309 used the package lmttest. Binomial confidence intervals were generated using the package  
310 binom.

### 311 **Beak length analyses**

312 Historical individual beak length measures and corresponding body sizes were located in  
313 the field notebooks of Scott Carroll from the year 1988, when they were originally collected.

314 Linear models (*lm*) with all combinations of host, year, body size, and all possible  
315 interactions (18 possible models) with Gaussian error distributions were compared using AIC.

316 For this analysis, the years 2013, 2014 and 2015 were grouped and compared to 1988 as discrete  
317 factors, rather than as a continuous variable. To assess how year and host influence beak length  
318 individually, pairwise comparisons were conducted using Welch's two-sample t-test, the results  
319 of which are reported in the main text. Beak length in 2014 fails to reject normality using the  
320 Shapiro-Wilk normality test; in 1988, beak length on each host plant individually fails to reject  
321 normality using the Shapiro-Wilk normality test.

### 322 **Correcting for body size**

323 Body size was controlled for in Carroll & Boyd 1992 using the complete body length  
324 from the anterior tip of the head to the posterior tip of the wing, excluding individuals that had  
325 truncated wings (<3% of their sample).

326 In 2013-2015 data, individuals with short wings made up approximately 48% of  
327 individuals from Key Largo and 4% of those from Lake Wales, and cannot be reasonably  
328 excluded from these samples. For individuals with truncated wings, this metric of body length is  
329 not a true indicator of the entire length of the body, as the abdomen extends beyond the tip of the  
330 closed wings regardless of an individual's condition. I instead use thorax width to control for  
331 body size in 2013-2015 samples. Thorax width has a positive linear relationship with beak  
332 length in both populations ( $R^2=.57$ ) and with body length in long-winged individuals where both  
333 metrics were taken ( $R^2=.77$ ; Extended Data Fig. 6).

334 For comparisons including both 2013-2015 and 1988 data, I used a subset of individuals  
335 with both body length and thorax width measurements from 2013-2015 to create a 'body length'  
336 metric for all wing morphs using linear regression. This metric was generated by estimating the  
337 linear relationship between body length and thorax width (body length= $2.796 \times$  thorax width  
338  $+2.875$ ) and using the thorax width of each individual to produce a body length for individuals



339 without this measurement. Using this measure allowed the inclusion of overall size as a  
340 covariate in models comparing year and host effects on beak length. The top 3 models, which  
341 carried the majority of probability using AIC, all had weakly heteroscedastic residual errors. To  
342 compensate for this problem, a power transformation with  $\lambda=-0.1655463$  was applied to beak  
343 length. This returned the same top 3 models, and did not alter the significance of any of the  
344 included factors or generate results different from those detected using pairwise t-tests.

345 Comparisons of all 8 populations measured in 2013-2015 were conducted using linear  
346 models or linear mixed models with all combinations of host, body size, and population as a  
347 random factor nested within host. The results of the top model, which carried >99% of the  
348 probability using AIC, are reported in the main text.

#### 349 **Survival analyses**

350 Historical survival means were extracted from Carroll et al 1998 Figure 4 using ImageJ.  
351 Using the sample sizes detailed in the same figure, the total number of survivors (1) and non-  
352 survivors (0) could be determined as a single possible number for each treatment, and so direct  
353 comparison to these data is possible. 95% confidence intervals in 2014 for individuals from *C.*  
354 *corindum* raised on *C. corindum* and *K. elegans*, respectively, are 0.17 & 0.22, while those from  
355 *K. elegans* are 0.18 and 0.22 when raised on the same two hosts. In 1988, the same 4 treatments  
356 have 95% confidence intervals of 0.27, 0.35, 0.32, and 0.24, respectively, using the Pearson-  
357 Klopfer method. Confidence intervals for every population/natal host/year combination are  
358 plotted in Fig. 2 and Extended data Fig. 2.

359 For comparisons in only present day populations, all possible combinations of natal host,  
360 population host, individual population (random effect, nested within population host), family  
361 (random effect, nested within population), and interactions between fixed effects were

362 considered in either generalized linear models (glm) or generalized linear mixed models (glmer  
363 in the package lme4) in the statistical program R using a binomial error distribution. All models  
364 were compared using AIC. For comparisons in only historical data, models containing natal  
365 host, population host, the interaction, and population as a random effect were compared using  
366 AIC. For clarity, results in the main text are reported from analyses conducted separately for  
367 each year.

368 For comparisons between years, all possible combinations of year, natal host, population  
369 host, individual population (random effect, nested within population host) and interactions  
370 between fixed effects were considered in either generalized linear models (glm) or generalized  
371 linear mixed models (glmer in the package lme4) in the statistical program R using a binomial  
372 error distribution. All models were compared using AIC. The results of the top 3 models for the  
373 between-year comparison are consistent with the results of within-year comparisons.

#### 374 **Egg weight analyses**

375 Historical egg weight data means and standard errors were extracted from Carroll et al  
376 1998 Figure 2 using ImageJ. Using the sample sizes detailed in the same figure, data was  
377 simulated for statistical comparison to present day data. Data for each population was randomly  
378 sampled from a normal distribution with the mean and standard deviation of that population in  
379 1988. This process was used to generate 1000 datasets with sample sizes equivalent to those in  
380 Carroll et al 1998. Present day egg weight data fails to reject normality using the Shapiro-Wilk  
381 normality test, making the normal distribution a reasonable choice for simulating historical data.  
382 Each simulated dataset was compared to the data collected in 2014 using two two-tailed t.tests:  
383 One looking at the effect of year on egg weight for bugs from *C.corindum* and one looking at the  
384 effect of year on egg weight for bugs from *K.elegans*. In all 1000 generated datasets, 2014 and

385 1988 measures were indistinguishable on *K.elegans* ( $t < 1.76$ ,  $df = 48$ ,  $p > 0.05$ ) and significantly  
386 different on *C. corindum* ( $t > 5$ ,  $df = 18$ ,  $p < .001$ ).

387 For analyses of 2014 data alone, the generalized linear model of population host and a  
388 generalized linear mixed models (package lme4) containing individual and population were  
389 compared using AIC.

### 390 **Development time analyses**

391 Historical development time data means and standard errors were extracted from Carroll  
392 et al 1997 Figure 3 using ImageJ. Using the sample sizes detailed in the same figure, data was  
393 simulated for statistical comparison to present day data. Data for each population and sex was  
394 randomly sampled from a normal distribution with the mean and standard deviation of that  
395 population and sex in 1991. This process was used to generate 1000 datasets with sample sizes  
396 equivalent to those in Carroll et al 1997. Present day development time data fails to reject  
397 normality using the Shapiro-Wilk normality test, making the normal distribution a reasonable  
398 choice for simulating historical data. To select the best linear model to describe these data, 10  
399 sample datasets were each run through all possible linear models with combinations of the three  
400 main effects (host, year, and sex) and all possible interactions. These 19 models were then  
401 compared using AIC, and the model with the highest total weighted probability (calculated from  
402 AIC) across all ten iterations was selected. Each dataset was then compared to the data collected  
403 in 2014 using a this selected model (population host + year + sex + host\*year + sex\*year), along  
404 with two t.tests: One looking at the effect of year on egg weight for bugs from *C.corindum* and  
405 one looking at the effect of year on egg weight for bugs from *K.elegans*. The output of these  
406 models was then aggregated, and the summary of test statistics (t-values) and effect estimates  
407 was examined for each case. Mean effect estimates, t-values, and p-values are reported in the

408 main text for pairwise t-tests. Predictors or interactions for which the effect size was in the same  
409 direction in >95% of cases (950 cases out of 1000) were considered to have a consistent,  
410 detectable effect. The results of these simulations are reported in Extended Data Table 1.

411

## 412 **References and Notes:**

- 413 1. Nosil, P. *Ecological Speciation*. (Oxford University Press, 2012).
- 414 2. Rosenblum, E. B. *et al.* Goldilocks Meets Santa Rosalia: An Ephemeral Speciation Model  
415 Explains Patterns of Diversification Across Time Scales. *Evol. Biol.* **39**, 255–261 (2012).
- 416 3. Vantienderen, P. Evolution of Generalists and Specialists in Spatially Heterogeneous  
417 Environments. *Evolution* **45**, 1317–1331 (1991).
- 418 4. Venail, P. A., Kaltz, O., Olivieri, I., Pommier, T. & Mouquet, N. Diversification in temporally  
419 heterogeneous environments: effect of the grain in experimental bacterial populations. *J. Evol.*  
420 *Biol.* **24**, 2485–2495 (2011).
- 421 5. Ronce, O. & Kirkpatrick, M. When sources become sinks: Migrational meltdown in  
422 heterogeneous habitats. *Evolution* **55**, 1520–1531 (2001).
- 423 6. Schonewald-Cox, C., Chambers, S., MacBryde, B. & Thomas, L. *Genetics and Conservation*.  
424 (Benjamin/Cummings, 1983).
- 425 7. Bettles, C. M., Docker, M. F., Dufour, B. & Heath, D. D. Hybridization dynamics between  
426 sympatric species of trout: loss of reproductive isolation. *J. Evol. Biol.* **18**, 1220–1233 (2005).
- 427 8. Seehausen, O., van Alphen, J. J. M. & Witte, F. Cichlid fish diversity threatened by  
428 eutrophication that curbs sexual selection. *Science* **277**, 1808–1811 (1997).

- 429 9. Taylor, E. B. *et al.* Speciation in reverse: morphological and genetic evidence of the collapse  
430 of a three-spined stickleback (*Gasterosteus aculeatus*) species pair. *Mol. Ecol.* **15**, 343–355  
431 (2006).
- 432 10. Hendry, A. P. *et al.* Possible human impacts on adaptive radiation: beak size bimodality  
433 in Darwin’s finches. *Proc. R. Soc. Lond. B Biol. Sci.* **273**, 1887–1894 (2006).
- 434 11. Carroll, S. & Boyd, C. Host Race Radiation in the Soapberry Bug - Natural-History with  
435 the History. *Evolution* **46**, 1052–1069 (1992).
- 436 12. Carroll, S. P., Klassen, S. T. P. & Dingle, H. Rapidly evolving adaptations to host  
437 ecology and nutrition in the soapberry bug. *Evol. Ecol.* **12**, 955–968 (1998).
- 438 13. Carroll, S. P., Dingle, H. & Klassen, S. P. Genetic differentiation of fitness-associated  
439 traits among rapidly evolving populations of the soapberry bug. *Evolution* **51**, 1182–1188  
440 (1997).
- 441 14. Carroll, S. P. & Loye, J. Invasion, Colonization, and Disturbance; Historical Ecology of  
442 the Endangered Miami Blue Butterfly. *J. Insect Conserv.* **10**, 13–27 (2006).
- 443 15. Venail, P. A., Kaltz, O., Olivieri, I., Pommier, T. & Mouquet, N. Diversification in  
444 temporally heterogeneous environments: effect of the grain in experimental bacterial  
445 populations. *J. Evol. Biol.* **24**, 2485–2495 (2011).
- 446 16. Carlson, S. M., Cunningham, C. J. & Westley, P. A. H. Evolutionary rescue in a changing  
447 world. *Trends Ecol. Evol.* **29**, 521–530 (2014).
- 448 17. Carroll, S. P., Hendry, A. P., Reznick, D. N. & Fox, C. W. Evolution on ecological time-  
449 scales. *Funct. Ecol.* **21**, 387–393 (2007).
- 450 18. Alberti, M. Eco-evolutionary dynamics in an urbanizing planet. *Trends Ecol. Evol.* **30**,  
451 114–126 (2015).

- 452 19. Kinnison, M. T. & Hairston, N. G. Eco-evolutionary conservation biology: contemporary  
453 evolution and the dynamics of persistence. *Funct. Ecol.* **21**, 444–454 (2007).
- 454 20. Bradshaw, W. E. CLIMATE CHANGE: Evolutionary Response to Rapid Climate  
455 Change. *Science* **312**, 1477–1478 (2006).
- 456 21. Phillips, B. L. & Shine, R. Adapting to an invasive species: Toxic cane toads induce  
457 morphological change in Australian snakes. *Proc. Natl. Acad. Sci.* **101**, 17150–17155 (2004).
- 458 22. Olsen, E. M. *et al.* Maturation trends indicative of rapid evolution preceded the collapse  
459 of northern cod. *Nature* **428**, 932–935 (2004).

460

#### 461 **Acknowledgements**

462 I would like to thank L. Yang, C. Martin, T. Farkas, J. Berg, S. Carroll, and J. Rosenheim  
463 for their comments on earlier drafts of this manuscript. I would also like to thank S. Carroll for  
464 sharing his data and expertise, and A. Sharma for assistance with insect rearing. I thank the  
465 Florida State Parks Department for permitting the collection of bugs in Florida State Parks.  
466 Funding was provided by the University of California-Davis Department of Entomology, the  
467 Center for Population Biology, and a Henry A. Jastro Research Fellowship.

468

469
